# Supplementary material
Source: PubMed Central journal article supplement (PMC3287216)
Supplement: JCI58215sd.pdf [file JCI58215sd.pdf]

Supplemental Information: This Supplement contains eight Figures and three Tables.

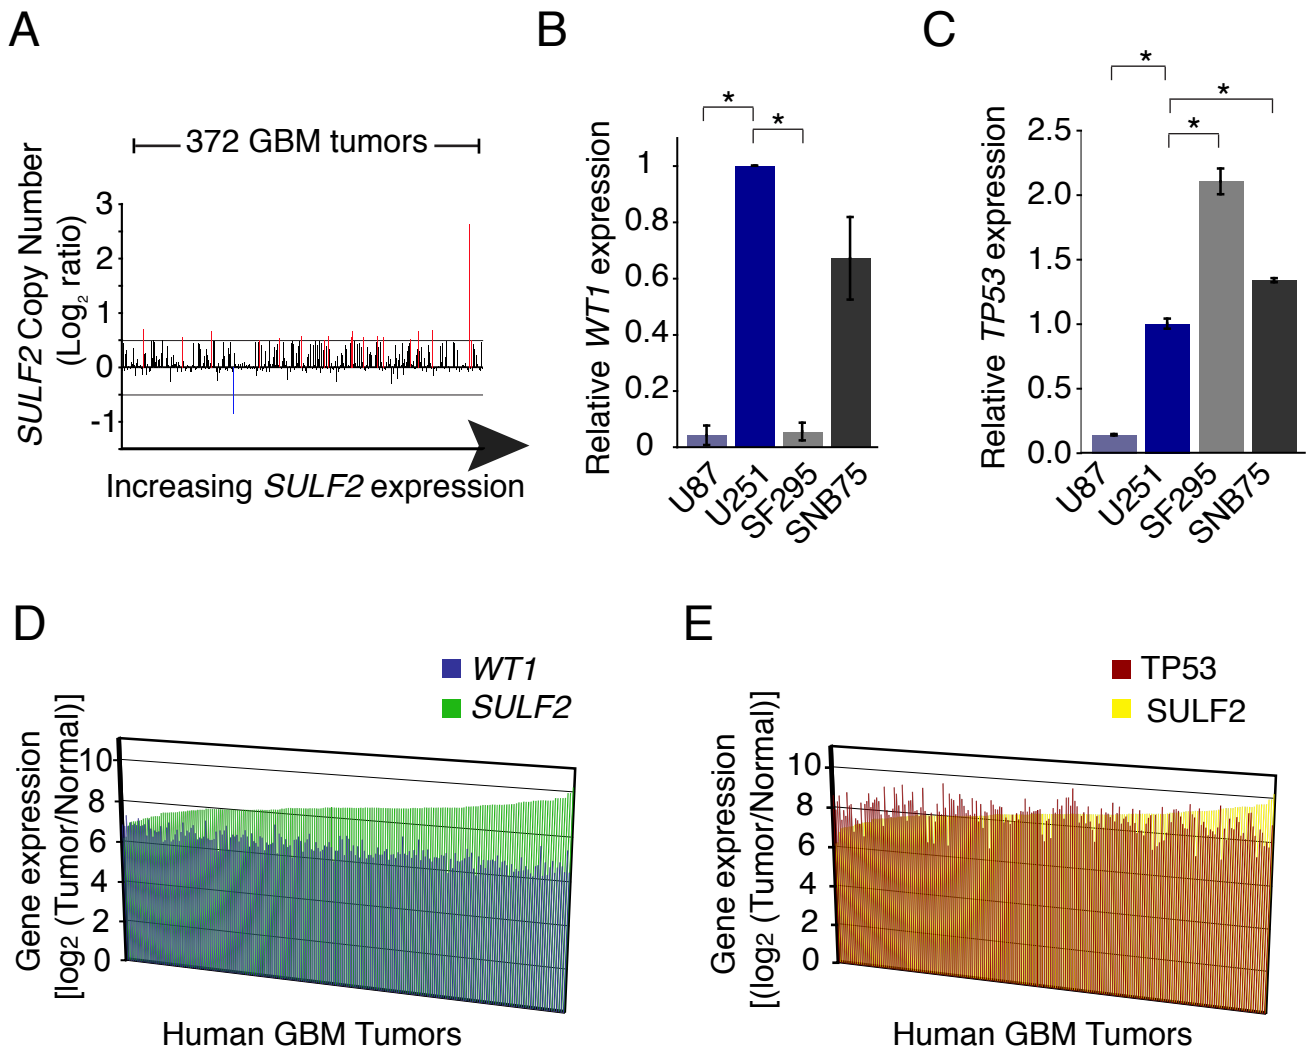

**Supplemental Figure 1. Gene amplification of *SULF2* and expression of *WT1* and *TP53* in primary human GBM and human GBM cell lines.** (A) Amplification (red) of 20q13.12-q13.13 including the *SULF2* gene in 18 of 372 primary human GBM tumors plotted from low to high expression levels of *SULF2* (x-axis). *SULF2* expression was increased in 11 of these 18 tumors (62%), see Table S1. One of 372 tumors showed deletion (blue) of this region. (B) Relative *WT1* expression in four human glioma cells lines with different expression levels of *SULF2* (Figures 1D) as determined by qRT-PCR. Results are means  $\pm$  SEM ( $n=3$ ),  $*p<0.005$ . (C) Relative expression of *TP53* expression in four human glioma cells lines as determined by qRT-PCR. Results are means  $\pm$  SEM ( $n=3$ ),  $*p<0.005$ . (D) No significant association between expression of *SULF2* and expression of *WT1* in primary human GBM (Pearson correlation coefficient,  $r= -0.202$ ). (E) No significant association between expression of *SULF2* and expression of *TP53* in primary human GBM (Pearson correlation coefficient,  $r=0.20$ ). In silico analysis was performed on expression data from the TCGA Data Portal (2011) for panels (A), (D), and (E). See also Supplemental Table 1 and 2.

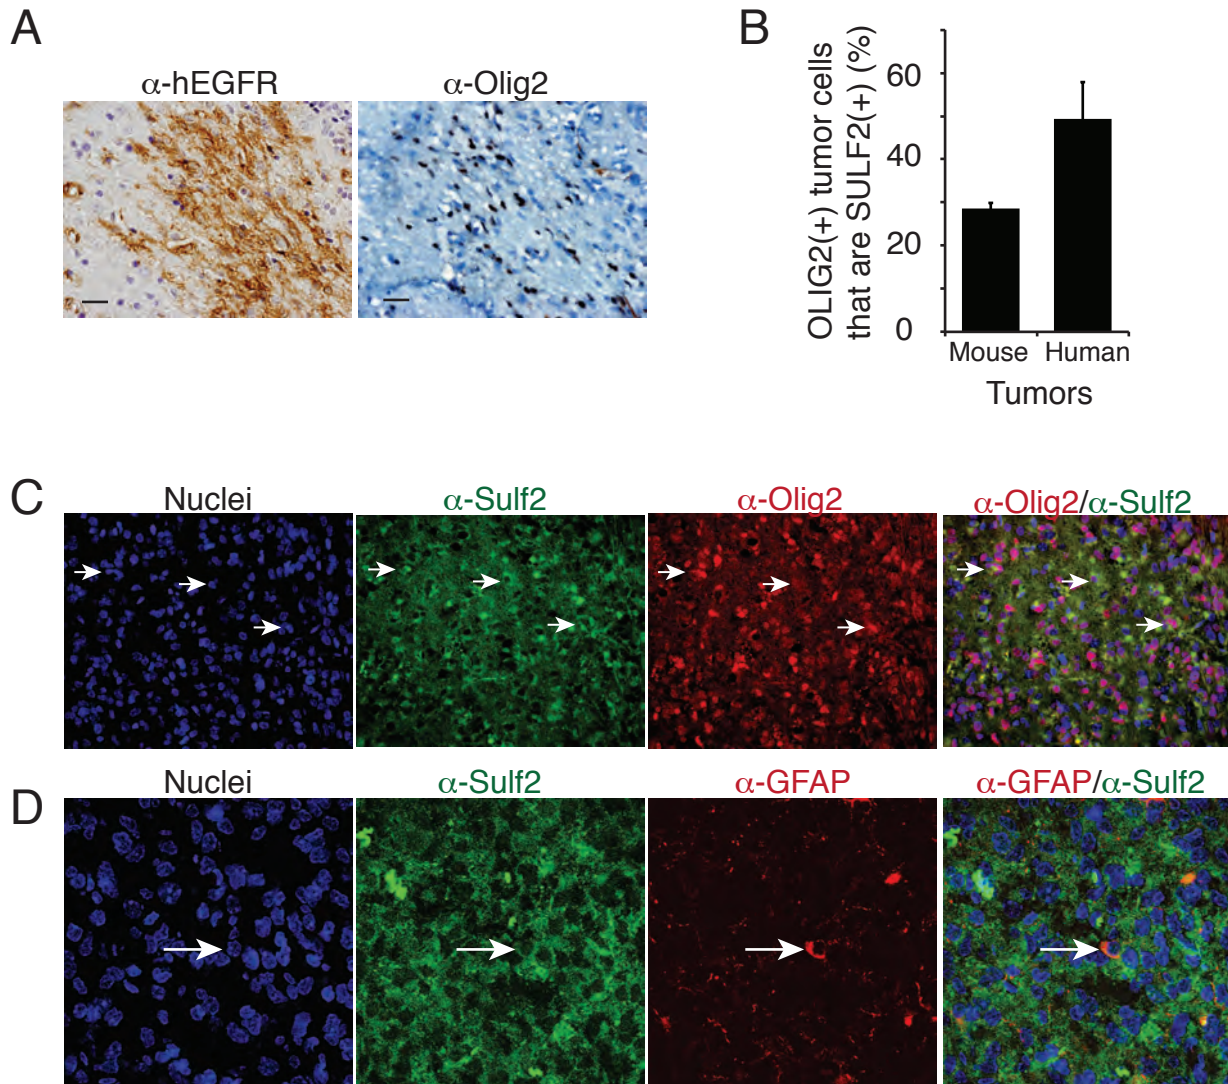

**Supplemental Figure 2. SULF2 expression in murine and human tumor cells.** (A,C,D) Representative images of murine tumors immunostained for EGFR (A), Olig2 (A, C), Sulf2 (C,D), and GFAP (D). (A) Expression of Olig2 in human EGFR-positive murine tumors. (B) Fraction of OLIG2(+) tumor cells that are also SULF2(+) in murine tumors and in primary human GBM. Mean  $\pm$  SEM, n=4 and n=5, respectively. Three to five random fields (400x magnification) were quantified per tumor. (C,D) Dual immunofluorescence in murine tumors demonstrates Sulf2 protein (C and D, green) expression in both Olig2-(C, red) and GFAP-(D, red) positive cells. Scale bar represents 20  $\mu$ m (A); original magnification x400 (C) and x630 with oil (D).

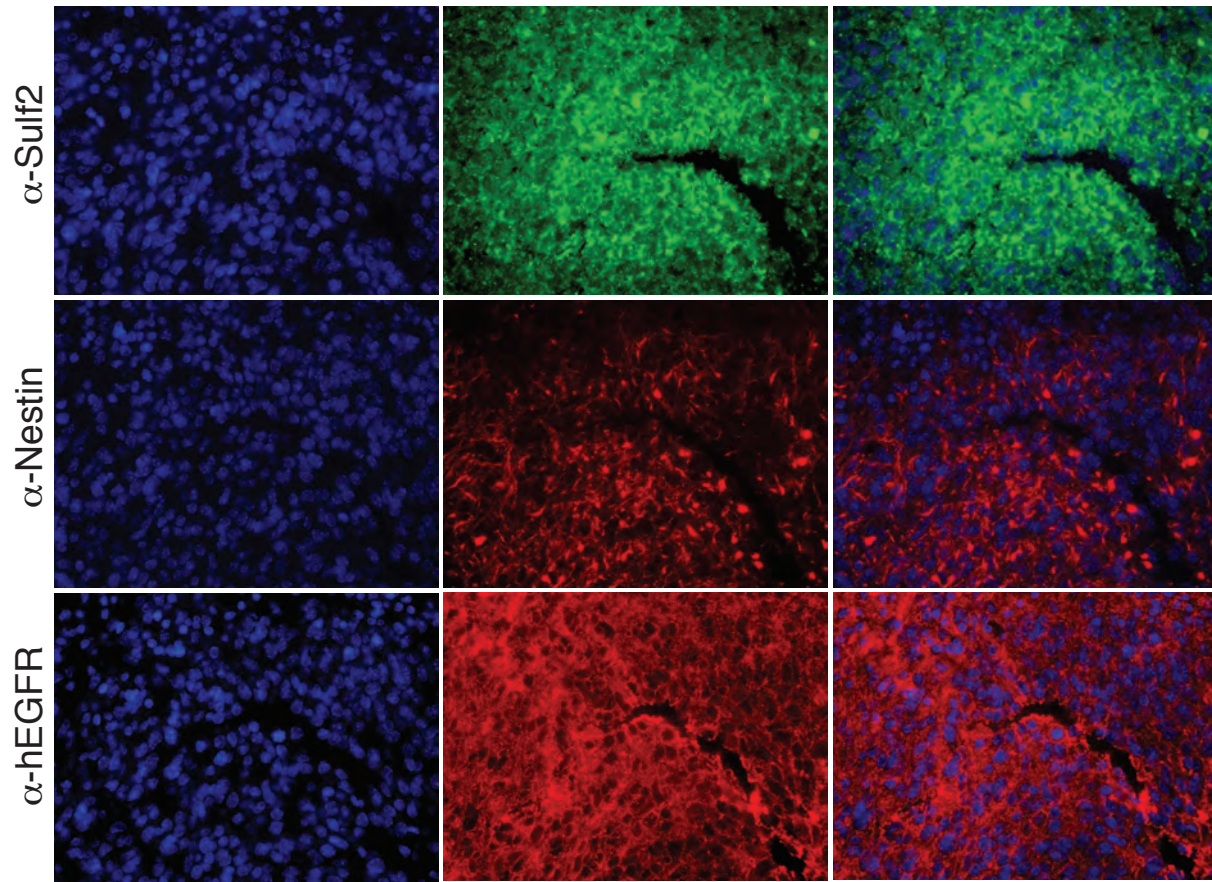

**Supplemental Figure 3. Sulf2 expression in murine tumors.** Representative serial sections of murine tumors immunostained to highlight hEGFR-positive tumor cells (red, bottom), Sulf2-positive cells (green, top), and Nestin-positive cells (red, middle). In areas with dense tumor and dense Sulf2-positivity a subpopulation of tumors cells appear to also be Nestin-positive. Original magnification x630 with oil. Nuclei are stained with DAPI (blue, left and in merged image on the right).

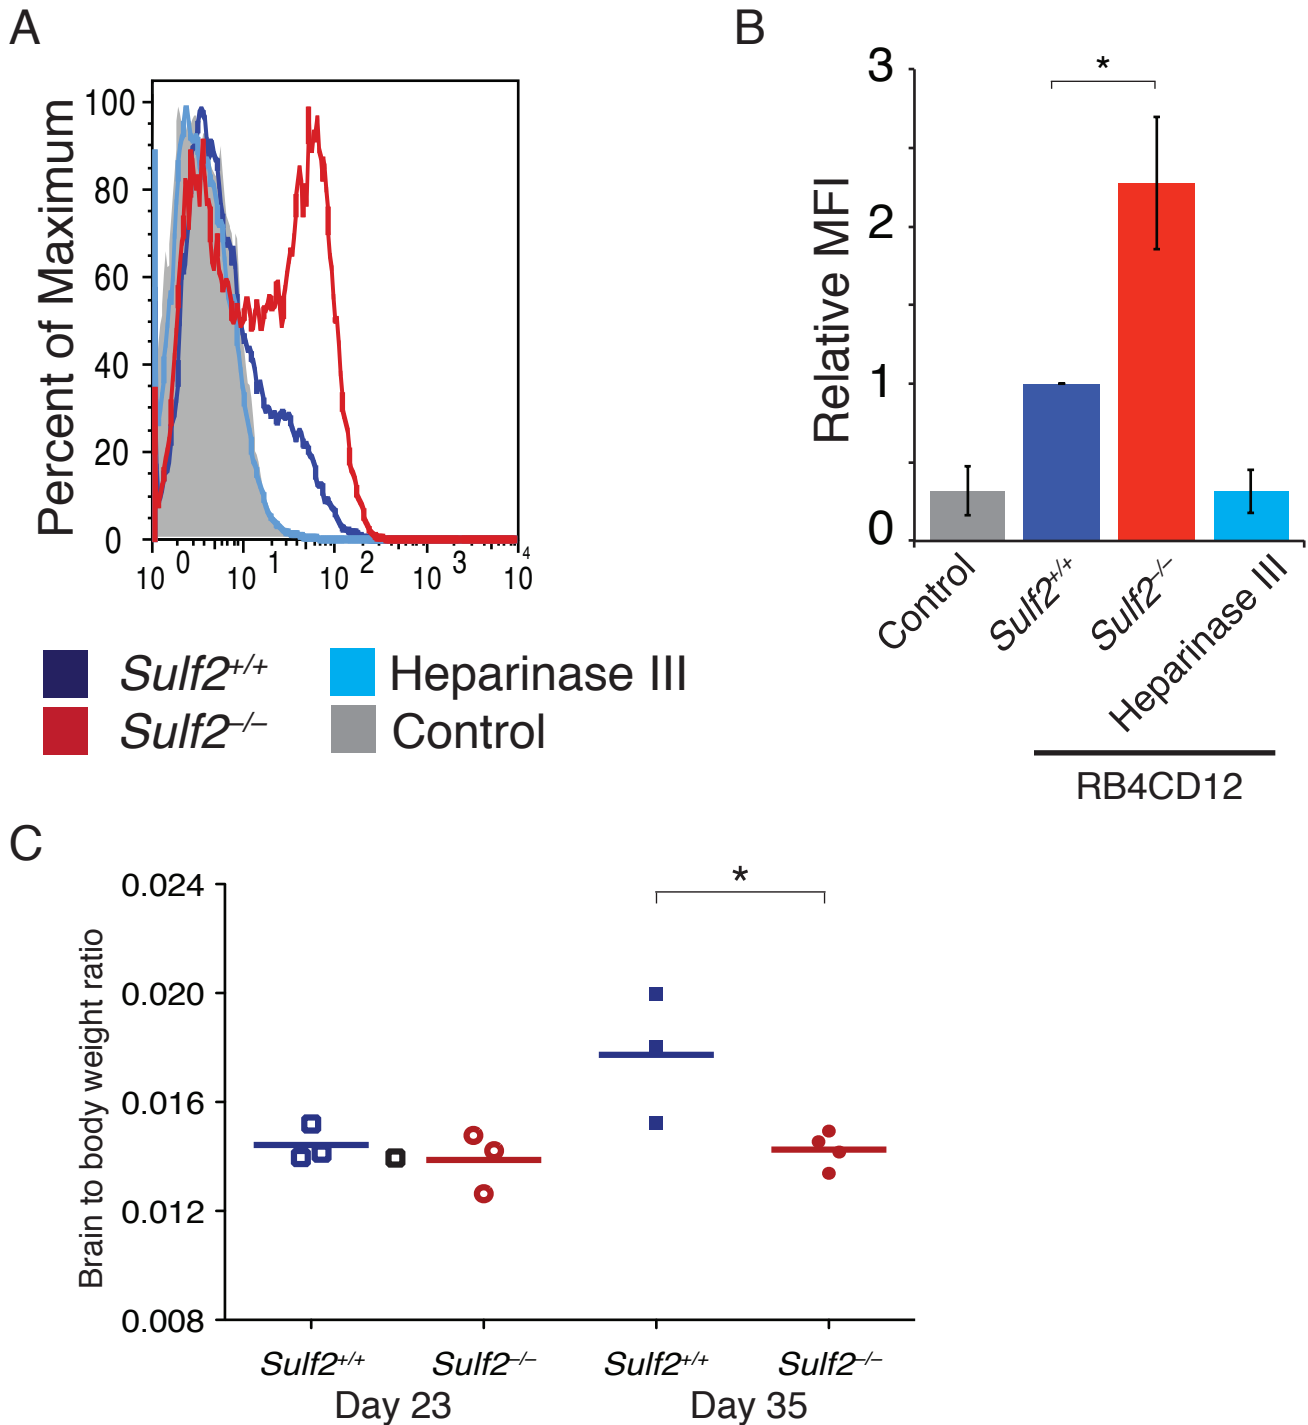

**Supplemental Figure 4. *Sulf2*<sup>-/-</sup> neurospheres have increased levels of cell surface sulfated heparan sulfate proteoglycans and *Sulf2*<sup>-/-</sup> tumor neurospheres have decreased tumor growth in vivo.** (A) Murine *Sulf2*<sup>+/+</sup> (blue) and *Sulf2*<sup>-/-</sup> (red) neurospheres were analyzed for staining with RB4CD12, specific to highly sulfated HSPGs. Heparinase III pretreatment destroyed the RB4CD12 epitope (light blue). MPB49, a non-HSPG binding scFv antibody, was used as a negative control (grey shading). Data are representative of two independent determinations. (B) Mean fluorescence intensity (MFI) normalized to RB4CD12 levels on *Sulf2*<sup>+/+</sup> neurospheres. (\**p*<0.05, *n*=2, mean ± SD) Data are derived from two independent determinations. (C) Brain to body weight ratio of mice with *Sulf2*<sup>+/+</sup> (blue) and *Sulf2*<sup>-/-</sup> (red) tumors at Day 23 and Day 35. \**p*<0.05 (one-way ANOVA, Tukey post hoc test), *n*=3-4 mice per group. Bar denotes mean and black box denotes ratio in normal FVB mice without tumor.

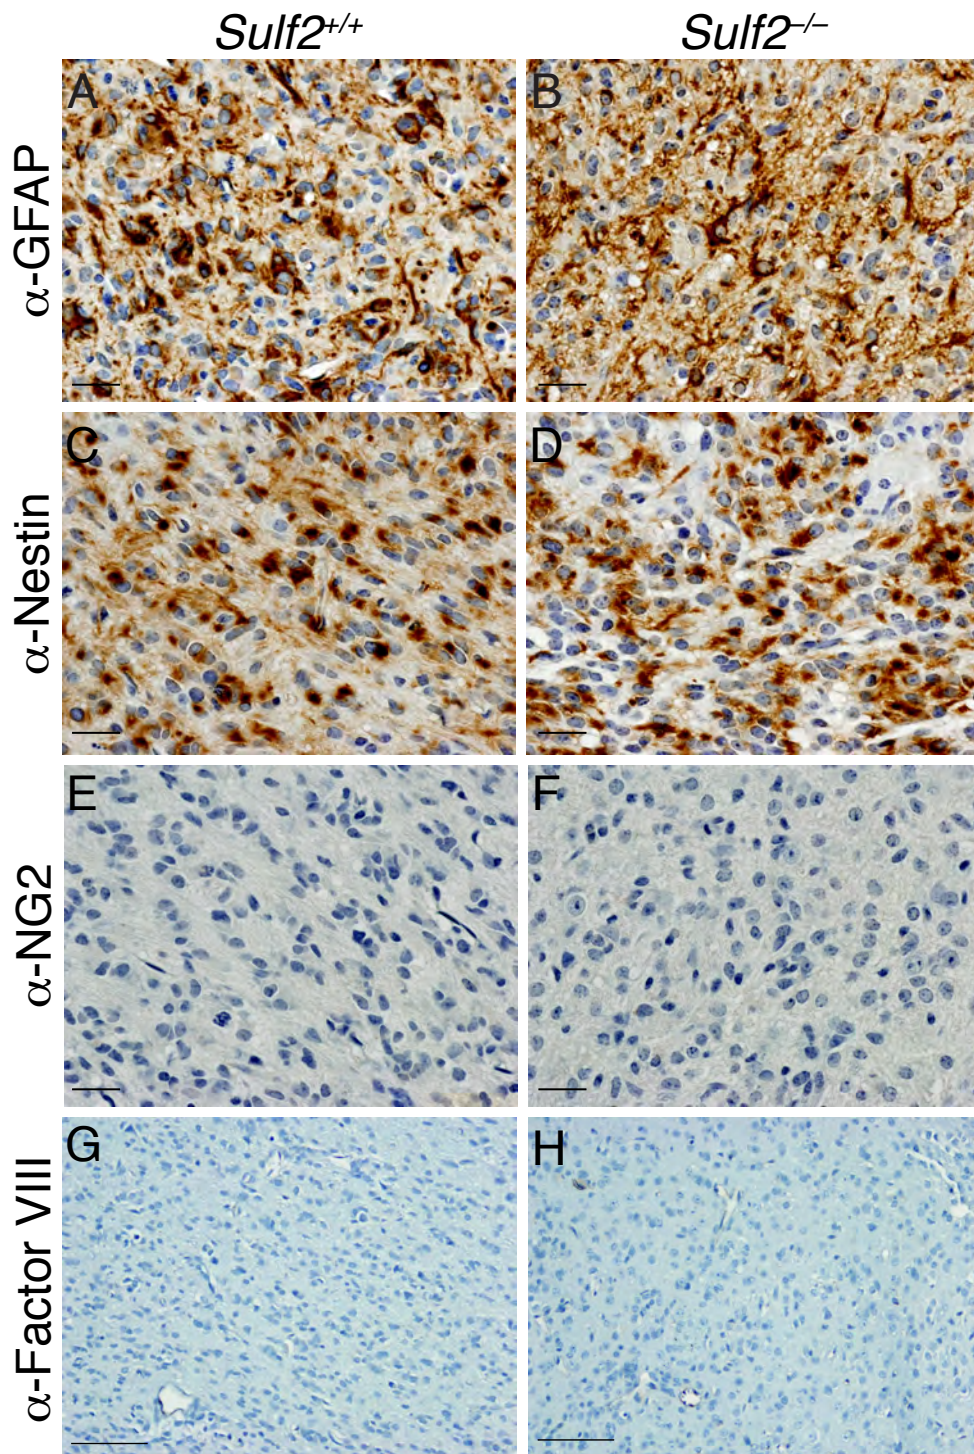

**Supplemental Figure 5. *Sulf2*<sup>+/+</sup> and *Sulf2*<sup>-/-</sup> tumor progenitors express similar markers of differentiation and similar blood vessel morphology.** (A-D) Representative images of GFAP (A, B), Nestin (C, D), NG2 (E, F), and Factor VIII (G-H) immunostaining demonstrating a similar pattern and extent of expression in *Sulf2*<sup>-/-</sup> and *Sulf2*<sup>+/+</sup> tumors. Scale bar represents 60  $\mu$ m.

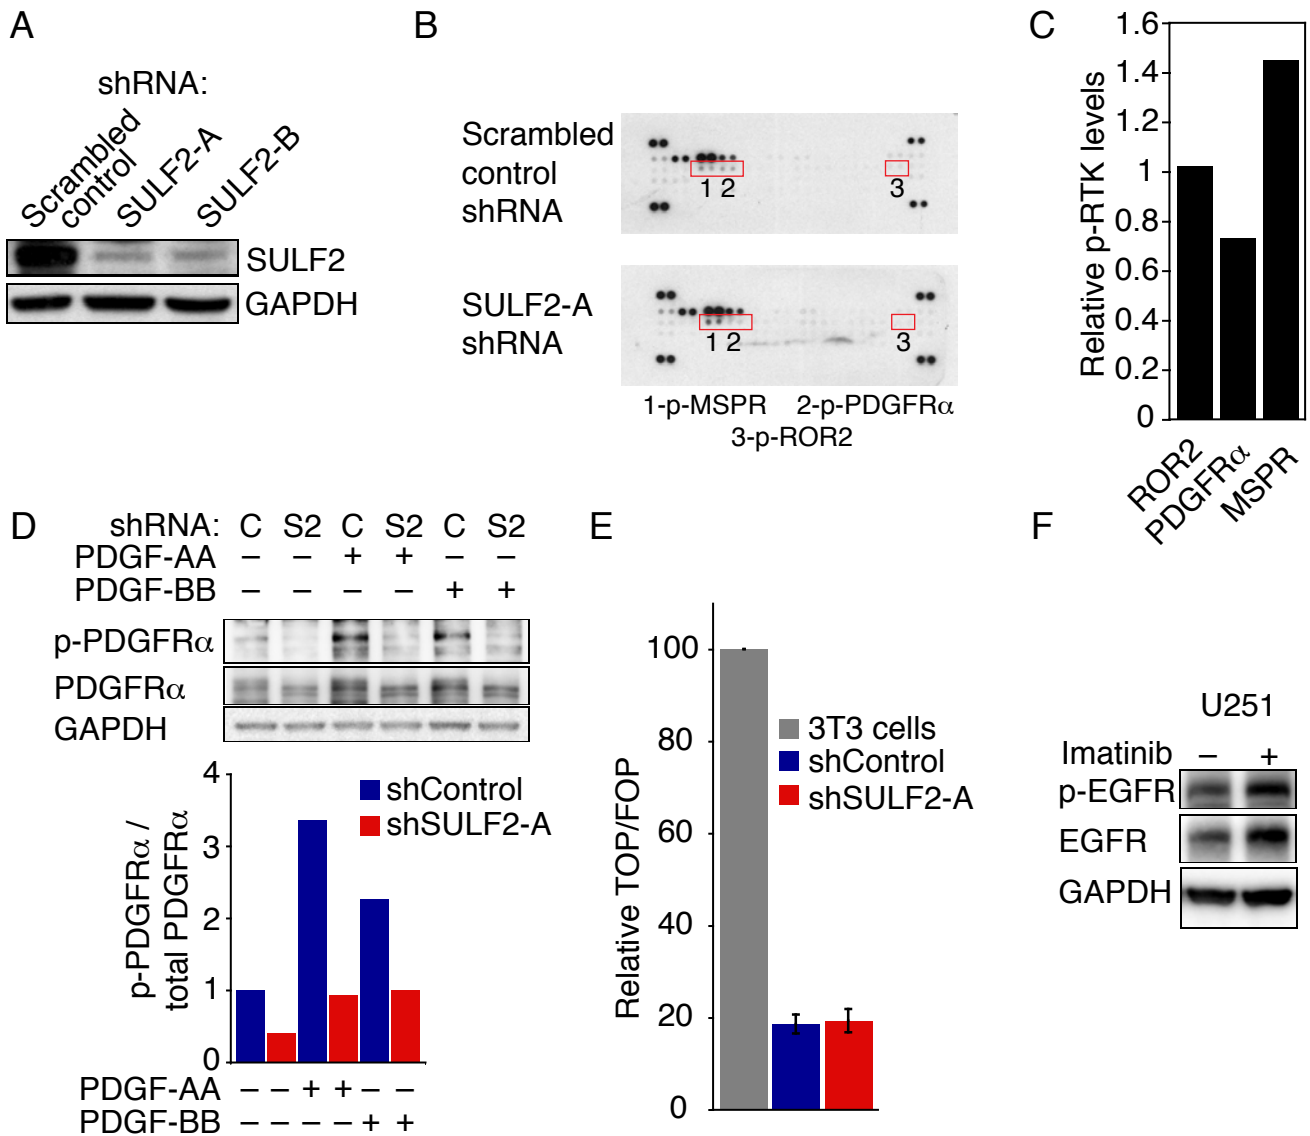

**Supplemental Figure 6. SULF2 alters the activity of several RTKs in SNB75 cells and alters the responsiveness of U251 cells to PDGF ligands.** (A) Efficient knockdown of SULF2 in SNB-75, a human high-grade astrocytoma cell line, by two different shRNA constructs (SULF2-A and SULF2-B) as compared to a scrambled shRNA control (Control). (B) RTK antibody arrays were used to compare RTK activity in protein lysates from SNB75 cells expressing scrambled Control or SULF2-A shRNA. The identity of select RTKs including PDGFR $\alpha$  is indicated. The dark streak at the bottom of the SULF2-A array is an artifact. (C) Relative levels of phosphorylated RTKs in cells with knockdown of SULF2 normalized to the levels in scrambled shRNA Control cells. Duplicate spots were averaged. Cells with knockdown of SULF2 had a 37% decrease in phosphorylated PDGFR $\alpha$ . (D) In U251 cells, knockdown of SULF2 decreases PDGFR $\alpha$  activation in response to PDGF-AA (100 ng/mL) and PDGF-BB (200 ng/mL) stimulation. C=scrambled shRNA control and S2=SULF2-A shRNA. Relative levels of phosphorylated to total PDGFR $\alpha$  are normalized to levels in unstimulated scrambled shRNA control cells. Data is representative of two experiments. (E) SULF2 knockdown has no effect on autocrine Wnt signaling in U251 cells. Mean  $\pm$  SEM for three determinations of TOP/FOP activity relative to positive control are shown (%). 3T3 cells expressing Wnt3a were used as a positive control. (F) There was no decrease in levels of phosphorylated EGFR in Imatinib mesylate-treated versus saline treated U251 cells.

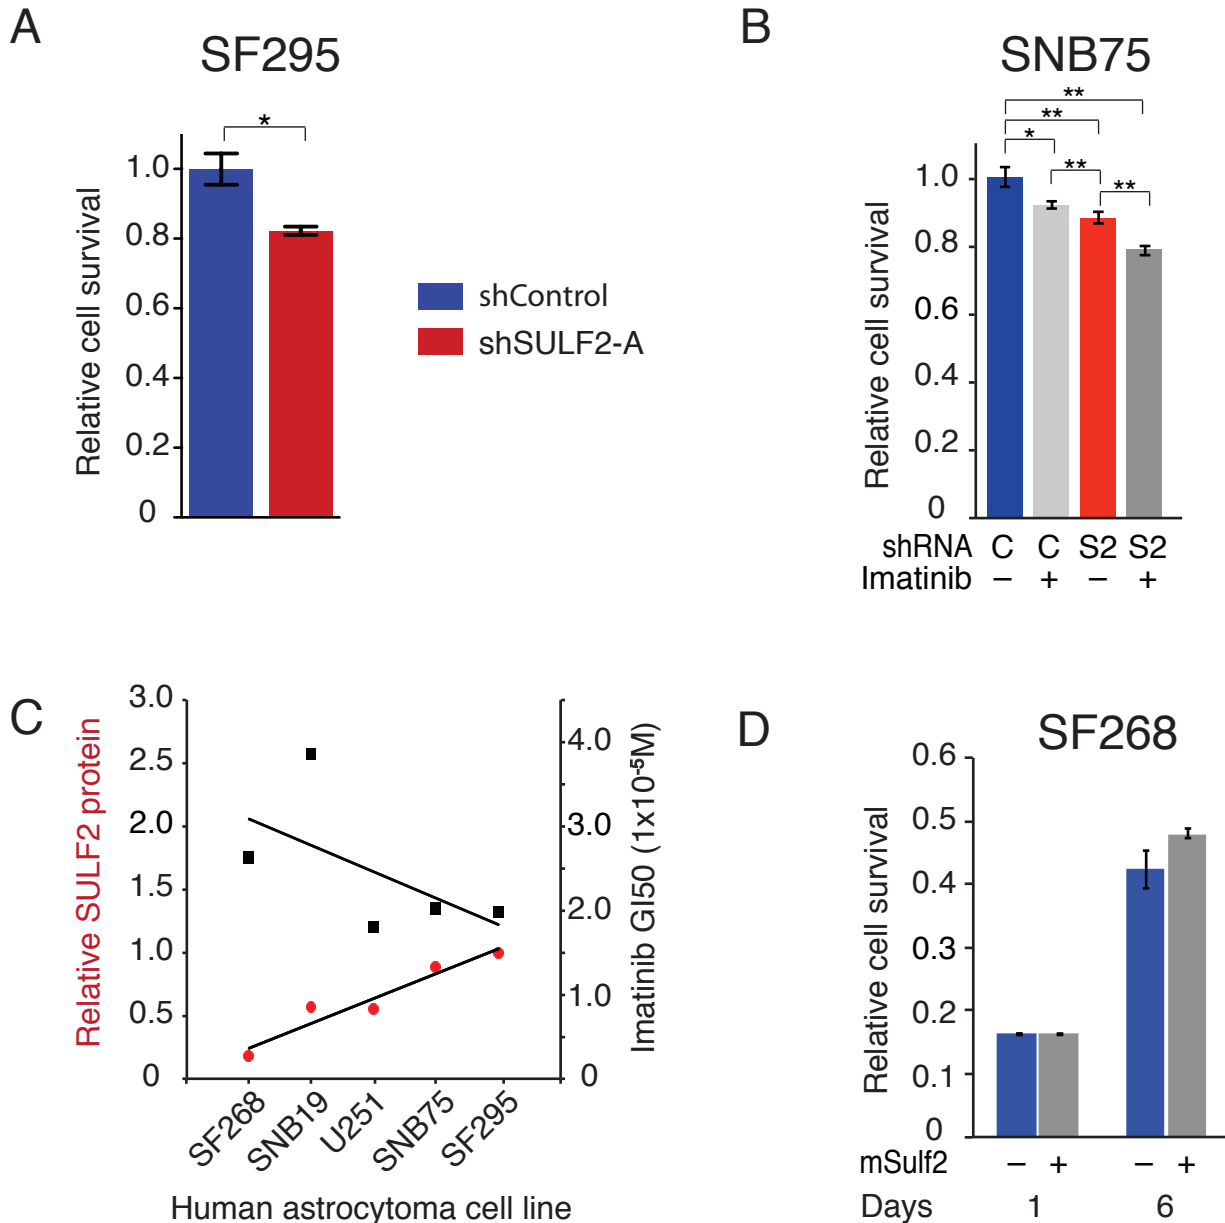

**Supplemental Figure 7. Tumor cell viability in multiple human astrocytoma cell lines with SULF2 knockdown and overexpression and imatinib-sensitivity and SULF2 protein expression in a subset of NCI-60 cell lines.** (A) Knockdown of SULF2 in SF295 cells results in decreased cell viability. \* $p < 0.001$ ,  $n = 4$ , mean  $\pm$  SEM. (B) Knockdown of SULF2 in SNB75 cells in combination with inhibition of PDGFR $\alpha$  by imatinib mesylate (8  $\mu$ M) results in decreased cell viability. \* $p < 0.001$  and \*\* $p < 0.0001$ ,  $n = 5$ , mean  $\pm$  SD. (C) Relative SULF2 protein levels as determined by Western blot (red) and the imatinib growth inhibitory 50 (GI50) dose of imatinib obtained from the NCI-60 Cancer Cell Line Screen (<http://dtp.nci.nih.gov/index.html>). There was a trend between high SULF2 protein levels and increased sensitivity to the PDGFR $\alpha$  inhibitor imatinib ( $p < 0.088$ , based on linear regression). (D) Overexpression of murine Sulf2 (mSulf2) in SF268 cells trended with increased cell viability.  $p = 0.083$ ,  $n = 4$ , mean  $\pm$  SEM. (A, B, and D) are representative of 2 independent experiments done in quadruplicate. C=scrambled shRNA control and S2=SULF2-A shRNA.



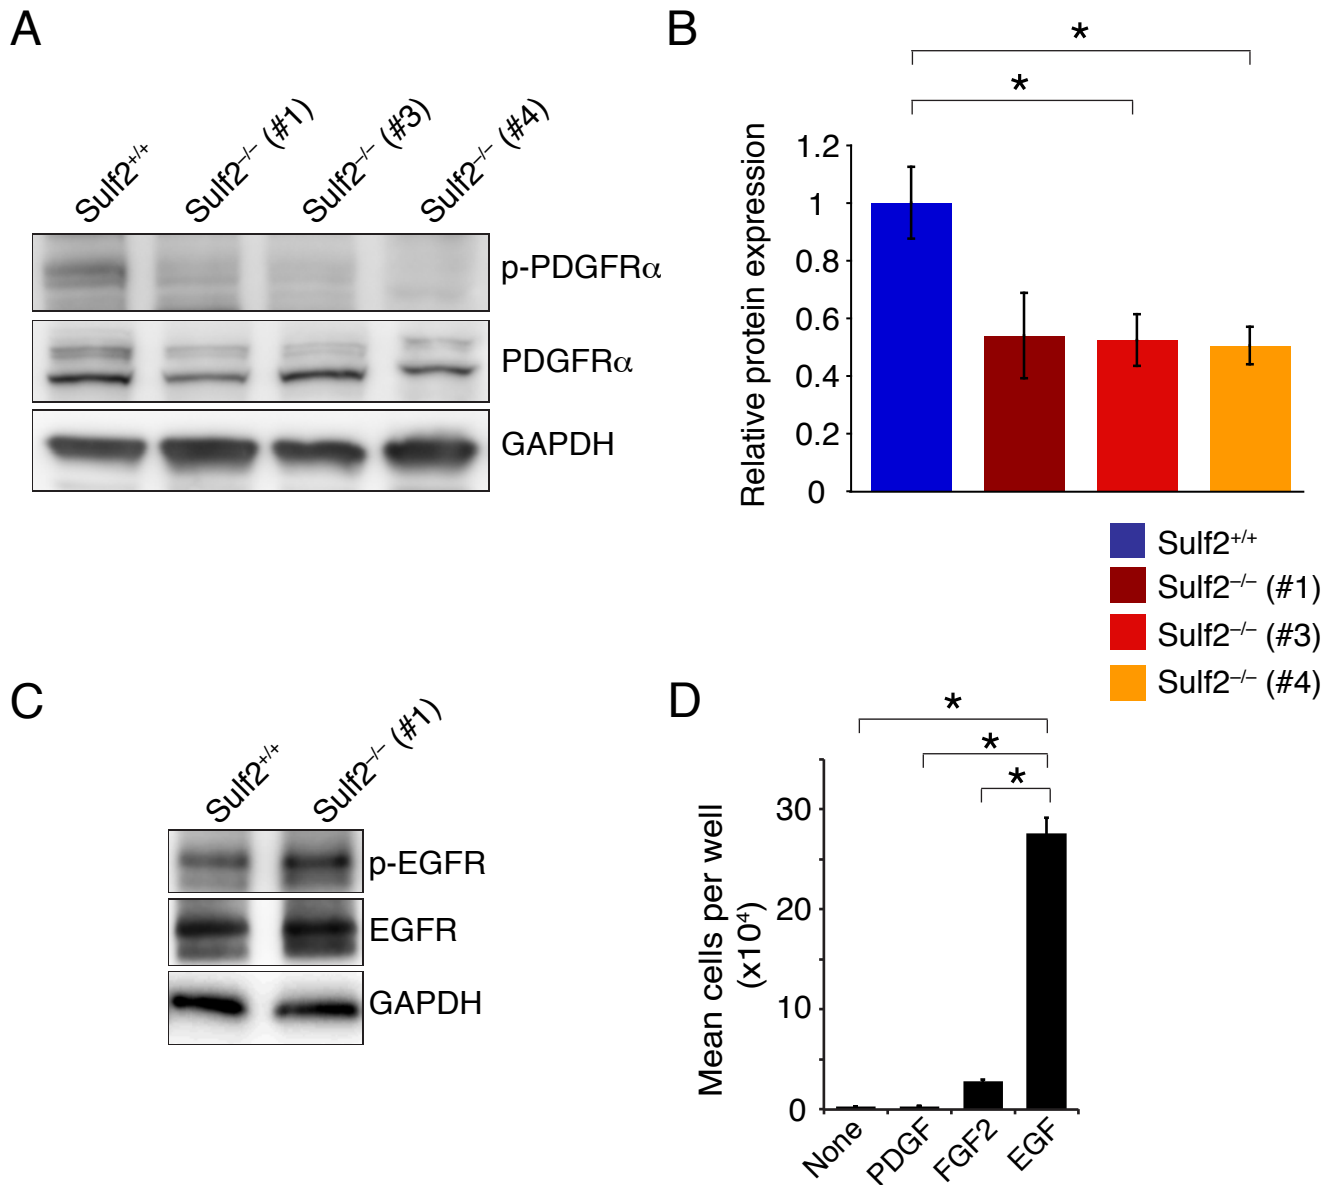

**Supplemental Figure 8. Decreased activation of PDGFR $\alpha$  following stimulation with PDGF-BB in *Sulf2*<sup>-/-</sup> tumor-NS relative to *Sulf2*<sup>+/+</sup> tumor-NS.** (A) Phosphorylated and total PDGFR $\alpha$  levels in *Sulf2*<sup>+/+</sup> tumor-NS and three independent *Sulf2*<sup>-/-</sup> tumor-NS lines following stimulation with PDGF-BB (100 ng/mL). Western blots were probed for GAPDH as a loading control. (B) Normalized mean ratio of p-PDGFR $\alpha$  to total PDGFR $\alpha$  levels in tumor-NS from *Sulf2*<sup>+/+</sup> cells and *Sulf2*<sup>-/-</sup> cells  $\pm$  SEM ( $n=3$  independent experiments),  $*p<0.05$ . (C) Phosphorylated and total EGFR levels in *Sulf2*<sup>+/+</sup> tumor-NS and *Sulf2*<sup>-/-</sup> tumor-NS line following stimulation with EGF (20 ng/mL). Western blots were probed for GAPDH as a loading control. (D) Tumor-prone neurospheres, expressing EGFRvIII, are responsive to exogenous growth factor and exhibit increased proliferation in response to EGF.  $*p<0.05$ ,  $n=3$  (one-way ANOVA, Tukey post hoc test). Data is representative of two independent experiments.

**Supplemental Table 1.** GBM with chromosomal alterations encompassing *SULF2* and *SULF2* expression.

| <b>Sample ID</b> | <b>Copy number<br/>(log<sub>2</sub> ratio)<sup>A</sup></b> | <b>SULF2 gene<br/>status<sup>B</sup></b> | <b><i>SULF2</i> expression<br/>(log<sub>2</sub> ratio)<sup>C</sup></b> | <b><i>SULF2</i> expression<br/>relative to normal<sup>D</sup></b> |
|------------------|------------------------------------------------------------|------------------------------------------|------------------------------------------------------------------------|-------------------------------------------------------------------|
| TCGA-16-0850     | -0.86                                                      | Deleted                                  | 0.415                                                                  | N                                                                 |
| TCGA-26-1799     | 0.504                                                      | Amplified                                | 1.024                                                                  | Increased                                                         |
| TCGA-02-0083     | 0.508                                                      | Amplified                                | 0.58                                                                   | N                                                                 |
| TCGA-41-2571     | 0.510                                                      | Amplified                                | 2.526                                                                  | Increased                                                         |
| TCGA-16-1060     | 0.514                                                      | Amplified                                | 1.651                                                                  | Increased                                                         |
| TCGA-02-0333     | 0.533                                                      | Amplified                                | 0.695                                                                  | N                                                                 |
| TCGA-06-0158     | 0.554                                                      | Amplified                                | 1.356                                                                  | Increased                                                         |
| TCGA-14-0871     | 0.555                                                      | Amplified                                | 1.18                                                                   | Increased                                                         |
| TCGA-06-0185     | 0.556                                                      | Amplified                                | -0.06                                                                  | N                                                                 |
| TCGA-12-3649     | 0.558                                                      | Amplified                                | 1.145                                                                  | Increased                                                         |
| TCGA-12-3648     | 0.572                                                      | Amplified                                | 1.03                                                                   | Increased                                                         |
| TCGA-32-2638     | 0.580                                                      | Amplified                                | 1.303                                                                  | Increased                                                         |
| TCGA-02-2466     | 0.584                                                      | Amplified                                | 0.82                                                                   | N                                                                 |
| TCGA-06-0171     | 0.664                                                      | Amplified                                | 1.145                                                                  | Increased                                                         |
| TCGA-26-1440     | 0.664                                                      | Amplified                                | 1.735                                                                  | Increased                                                         |
| TCGA-12-3652     | 0.671                                                      | Amplified                                | 0.241                                                                  | N                                                                 |
| TCGA-32-2634     | 0.689                                                      | Amplified                                | 1.898                                                                  | Increased                                                         |
| TCGA-14-2555     | 0.712                                                      | Amplified                                | -0.729                                                                 | N                                                                 |
| TCGA-02-0266     | 2.629                                                      | Amplified                                | 2.503                                                                  | Increased                                                         |

<sup>A</sup> Copy number data, log<sub>2</sub>[Tumor/ Normal], were obtained from TCGA Data Portal, Genome-wide SNP\_6.

<sup>B</sup> Expression data, log<sub>2</sub>[Tumor/ Normal], were obtained from TCGA Data Portal, AgilentG4502A\_07.

<sup>C</sup> Gene amplification detected in 18 of 372 tumors [log<sub>2</sub>(Tumor/Normal) greater than 0.5 (fold-change of copy number in tumor vs. normal greater than or equal to 1.41)].

<sup>D</sup> Increased *SULF2* expression detected in 12 of the 18 amplified tumors [log<sub>2</sub>(Tumor/Normal) greater than 1.0 (fold-change of expression in tumor vs. normal greater than or equal to 2.0)]. N = not changed.

**Supplemental Table 2.** SULF2 protein and chromosomal amplification of the SULF2 region in human glioma cell lines.

| <b>Cell line</b> | <b>SULF2 amplified<sup>A</sup></b> | <b>Protein by Western blot<sup>B</sup></b> |
|------------------|------------------------------------|--------------------------------------------|
| U87              | No                                 | 0                                          |
| U251             | No                                 | +                                          |
| SF295            | 4 copies                           | +++                                        |
| SNB75            | No                                 | ++                                         |

<sup>A</sup>The data were obtained from the Wellcome Trust Sanger Institute Cancer Genome Project web site, <http://www.sanger.ac.uk/genetics/CGP>.

<sup>B</sup>Refer to Figure 1D.

**Supplemental Table 3.** Association of *SULF2* expression with top 50 signature genes per subtype.

| Subtype <sup>A</sup> | Signature gene | Pearson Correlation ( <i>r</i> ) with <i>SULF2</i> expression | Centroid score <sup>B</sup> |
|----------------------|----------------|---------------------------------------------------------------|-----------------------------|
| Classical            | EGFR           | -0.115580562                                                  | 5.557410306                 |
| Classical            | MEOX2          | -0.18968974                                                   | 3.014033885                 |
| Classical            | SOCS2          | -0.059460725                                                  | 2.953222174                 |
| Classical            | NOS2A          | -0.117029845                                                  | 2.704431794                 |
| Classical            | ELOVL2         | -0.311473134                                                  | 2.643564304                 |
| Classical            | CDH4           | -0.025898981                                                  | 2.626412667                 |
| Classical            | KCNF1          | -0.110472497                                                  | 2.595180754                 |
| Classical            | ACSBG1         | -0.144826772                                                  | 2.240475404                 |
| Classical            | PDGFA          | -0.050653158                                                  | 2.232093504                 |
| Classical            | CENTD3         | -0.063495567                                                  | 2.201838057                 |
| Classical            | GRIK1          | -0.129678678                                                  | 2.178078649                 |
| Classical            | KLHL4          | -0.045487784                                                  | 2.174396997                 |
| Classical            | CAMK2B         | -0.251183635                                                  | 2.160479783                 |
| Classical            | GAS1           | -0.012388101                                                  | 2.157331506                 |
| Classical            | RGS6           | -0.168037199                                                  | 2.132652475                 |
| Classical            | VAV3           | -0.134790251                                                  | 2.119220614                 |
| Classical            | SLC4A4         | -0.12377635                                                   | 2.049291991                 |
| Classical            | MEIS1          | -0.112686958                                                  | 2.010976325                 |
| Classical            | FGFR3          | -0.263537208                                                  | 1.924263994                 |
| Classical            | MYO5C          | -0.075010811                                                  | 1.898741897                 |
| Classical            | HS3ST3B1       | -0.170504343                                                  | 1.81820168                  |
| Classical            | GPR17          | 0.337833577                                                   | 1.755839546                 |
| Classical            | DENND2A        | 0.042729644                                                   | 1.752964264                 |
| Classical            | MAB21L1        | 0.033143909                                                   | 1.747856699                 |
| Classical            | TRIB2          | 0.194131188                                                   | 1.721138384                 |
| Classical            | ZFHX4          | 0.12335461                                                    | 1.704410394                 |
| Classical            | KLHDC8A        | -0.168182508                                                  | 1.690371516                 |
| Classical            | NES            | 0.177529573                                                   | 1.636419217                 |
| Classical            | EYA2           | -0.174520861                                                  | 1.616748766                 |
| Classical            | WSCD1          | 0.127540728                                                   | 1.594705092                 |
| Classical            | B3GALT1        | -0.029169229                                                  | 1.587450407                 |
| Classical            | RASGRP1        | -0.13247987                                                   | 1.549222891                 |
| Classical            | CREB5          | 0.072331527                                                   | 1.530386499                 |
| Classical            | SHOX2          | -0.212246211                                                  | 1.51335036                  |
| Classical            | SPRY2          | -0.057857305                                                  | 1.513344234                 |
| Classical            | CDH6           | 0.022347111                                                   | 1.505705987                 |
| Classical            | IRS2           | 0.127238187                                                   | 1.487081107                 |
| Classical            | SOX9           | 0.030543779                                                   | 1.467308605                 |
| Classical            | FZD3           | 0.069387325                                                   | 1.466514547                 |
| Classical            | ACSL3          | -0.043629957                                                  | 1.443933117                 |
| Classical            | SEMA6D         | -0.012327747                                                  | 1.437743611                 |

|           |             |              |             |
|-----------|-------------|--------------|-------------|
| Classical | ITGA7       | -0.112996902 | 1.413810109 |
| Classical | ADAM19      | -0.095054307 | 1.399447467 |
| Classical | SLC6A11     | -0.117859557 | 1.394928863 |
| Classical | LFNG        | 0.003033656  | 1.392190926 |
| Classical | CDK6        | 0.028883554  | 1.377389935 |
| Classical | LMO2        | -0.12114917  | 1.369711994 |
| Classical | ABCD2       | -0.185082293 | 1.367282901 |
| Classical | MLC1        | -0.005815782 | 1.357427737 |
| Classical | TLE2        | 0.034240989  | 1.33963465  |
| Proneural | GPR17       | 0.337833577  | 5.468432217 |
| Proneural | TMSL8       | 0.218062933  | 3.992476825 |
| Proneural | KLRC3       | 0.333707754  | 3.936940273 |
| Proneural | DCX         | 0.27345802   | 3.919843024 |
| Proneural | PCDH11Y     | 0.164324563  | 3.843694578 |
| Proneural | KLRC4       | 0.34059644   | 3.665431855 |
| Proneural | NR0B1       | 0.239943543  | 3.348768422 |
| Proneural | HRASLS      | 0.220178912  | 3.191888842 |
| Proneural | RAB33A      | 0.185987563  | 3.117328296 |
| Proneural | ERBB3       | 0.272117809  | 3.025219038 |
| Proneural | RP11-35N6.1 | 0.323955889  | 2.956078893 |
| Proneural | C20orf42    | 0.391410317  | 2.827534384 |
| Proneural | UGT8        | 0.303314706  | 2.762886789 |
| Proneural | CA10        | 0.304483369  | 2.695186087 |
| Proneural | MYT1        | 0.383773554  | 2.586947018 |
| Proneural | SOX10       | 0.259946971  | 2.418246562 |
| Proneural | EPHB1       | 0.34246575   | 2.294696018 |
| Proneural | GRID2       | 0.212534666  | 2.190430493 |
| Proneural | SOX4        | 0.326747135  | 2.18410543  |
| Proneural | KLRK1       | 0.137927876  | 2.175892231 |
| Proneural | DNM3        | 0.339316904  | 2.153731862 |
| Proneural | PAK3        | 0.108815309  | 2.134435903 |
| Proneural | CLGN        | 0.04743658   | 2.127960561 |
| Proneural | SCN3A       | 0.329185104  | 2.074513781 |
| Proneural | SLC1A1      | 0.292433452  | 2.07093533  |
| Proneural | CHD7        | 0.314862649  | 2.062646657 |
| Proneural | GPR23       | 0.217000612  | 2.059646887 |
| Proneural | AMOTL2      | 0.383961118  | 2.02534041  |
| Proneural | SATB1       | 0.265084193  | 2.011413286 |
| Proneural | PCDH11X     | 0.106635441  | 1.996640431 |
| Proneural | CNTN1       | 0.281942384  | 1.970974884 |
| Proneural | TMEFF1      | 0.24358438   | 1.925661368 |
| Proneural | LRRTM4      | 0.130090798  | 1.868378262 |
| Proneural | TOX3        | 0.238161228  | 1.861721633 |
| Proneural | NOL4        | 0.122883595  | 1.848210821 |
| Proneural | FAM77C      | 0.255405039  | 1.84580465  |
| Proneural | WASF1       | 0.240741833  | 1.776402216 |
| Proneural | GNG4        | 0.138203969  | 1.755488546 |

|           |           |              |             |
|-----------|-----------|--------------|-------------|
| Proneural | DGKI      | 0.226628914  | 1.74233096  |
| Proneural | NKX2-2    | 0.341938832  | 1.727740769 |
| Proneural | C6orf134  | 0.293701931  | 1.703958545 |
| Proneural | ZNF804A   | 0.193486912  | 1.679547976 |
| Proneural | PDE10A    | 0.197745443  | 1.660129159 |
| Proneural | PAK7      | 0.100741149  | 1.650662618 |
| Proneural | C1orf106  | 0.242696835  | 1.650363925 |
| Proneural | CXXC4     | 0.239321749  | 1.64909308  |
| Proneural | CRMP1     | 0.269479493  | 1.636938016 |
| Proneural | SOX11     | 0.162151987  | 1.635874907 |
| Proneural | IL1RAPL1  | 0.255292129  | 1.62095582  |
| Proneural | C1QL1     | 0.451117724  | 1.610220205 |
| Neural    | AGXT2L1   | -0.154322298 | 4.950872056 |
| Neural    | CCK       | -0.308846741 | 4.420416444 |
| Neural    | CRYM      | -0.21849186  | 3.530168776 |
| Neural    | MYBPC1    | -0.2543174   | 3.419810513 |
| Neural    | NTSR2     | -0.21421043  | 3.183636216 |
| Neural    | GRM3      | -0.110231261 | 2.735847577 |
| Neural    | TMEM144   | -0.043114508 | 2.646316805 |
| Neural    | SERPINI1  | -0.069491581 | 2.484323069 |
| Neural    | HPCAL4    | -0.092219229 | 2.433494993 |
| Neural    | KCNK1     | -0.068535967 | 2.413141749 |
| Neural    | GPR22     | -0.150291711 | 2.377145579 |
| Neural    | PPP1R1A   | -0.059000766 | 2.374688784 |
| Neural    | VSX1      | -0.044499747 | 2.296134779 |
| Neural    | HPCA      | -0.200663581 | 2.045566953 |
| Neural    | GABRB2    | -0.20992257  | 1.983610681 |
| Neural    | FXYD1     | -0.239541738 | 1.932407353 |
| Neural    | DHRS9     | -0.118513213 | 1.881227543 |
| Neural    | SLCO1A2   | -0.040451831 | 1.848495044 |
| Neural    | CPNE6     | -0.181551699 | 1.847891094 |
| Neural    | CLCA4     | -0.128376956 | 1.802806021 |
| Neural    | ADD3      | 0.045236404  | 1.762683649 |
| Neural    | GPR17     | 0.337833577  | 1.755839546 |
| Neural    | FEZF2     | -0.180047948 | 1.74671515  |
| Neural    | VIP       | -0.302501116 | 1.693462883 |
| Neural    | LOC201229 | -0.172957197 | 1.651231679 |
| Neural    | EDG1      | -0.110214191 | 1.588158228 |
| Neural    | GRM1      | -0.198776306 | 1.548181069 |
| Neural    | CAMK2G    | -0.05955756  | 1.535910757 |
| Neural    | NDRG2     | -0.105763251 | 1.535569633 |
| Neural    | CA4       | -0.233999059 | 1.53146841  |
| Neural    | SNTA1     | -0.278179817 | 1.520110576 |
| Neural    | NDP       | -0.180389321 | 1.458907477 |
| Neural    | KCNJ3     | -0.176486469 | 1.418070803 |
| Neural    | CHN1      | -0.197169497 | 1.407695233 |
| Neural    | CRYL1     | -0.065669487 | 1.392508564 |

|             |          |              |             |
|-------------|----------|--------------|-------------|
| Neural      | PPP2R5A  | -0.015343994 | 1.303495503 |
| Neural      | TSNAX    | -0.072581043 | 1.274972072 |
| Neural      | SLC30A10 | -0.153321928 | 1.270285712 |
| Neural      | ACYP2    | -0.148482602 | 1.26664105  |
| Neural      | ANXA3    | -0.171245257 | 1.23151518  |
| Neural      | SEPP1    | -0.103398253 | 1.228340844 |
| Neural      | CASQ1    | -0.25053016  | 1.211868428 |
| Neural      | FLJ22655 | -0.16264993  | 1.168861631 |
| Neural      | IMPA1    | -0.029332378 | 1.163254655 |
| Neural      | NSL1     | -0.030719377 | 1.149288597 |
| Neural      | ZNF323   | -0.155469572 | 1.118032429 |
| Neural      | RBKS     | -0.152815882 | 1.11434835  |
| Neural      | YPEL5    | -0.059659641 | 1.111015924 |
| Neural      | TTPA     | -0.236164581 | 1.089801257 |
| Neural      | SEPW1    | -0.125111857 | 1.089409066 |
| Mesenchymal | LOX      | 0.138292539  | 2.914972782 |
| Mesenchymal | FHL2     | 0.033184578  | 2.770258389 |
| Mesenchymal | COL1A1   | 0.155689031  | 2.63225022  |
| Mesenchymal | COL1A2   | 0.125393122  | 2.591322432 |
| Mesenchymal | FCGR2B   | 0.017669327  | 2.319804811 |
| Mesenchymal | IGFBP6   | -0.052967699 | 2.31373282  |
| Mesenchymal | AIM1     | 0.153719687  | 2.309739855 |
| Mesenchymal | DCBLD2   | 0.197892058  | 2.277303553 |
| Mesenchymal | SERPINE1 | 0.150884473  | 2.237783994 |
| Mesenchymal | SRPX2    | 0.099138027  | 2.188744443 |
| Mesenchymal | LY96     | -0.024735736 | 2.104633625 |
| Mesenchymal | PLAU     | 0.218392416  | 2.021120318 |
| Mesenchymal | CLEC2B   | 0.003640771  | 2.009015485 |
| Mesenchymal | CSTA     | -0.048356069 | 1.992019483 |
| Mesenchymal | BNC2     | 0.08522686   | 1.965290585 |
| Mesenchymal | THBS1    | 0.193549714  | 1.951789507 |
| Mesenchymal | RAB27A   | 0.089739471  | 1.946635856 |
| Mesenchymal | FPRL2    | 0.162081323  | 1.920187975 |
| Mesenchymal | TGFBI    | 0.193328962  | 1.905329863 |
| Mesenchymal | COL5A1   | 0.051150965  | 1.881686203 |
| Mesenchymal | DSE      | 0.19815769   | 1.84810771  |
| Mesenchymal | PLAUR    | 0.073318973  | 1.845895497 |
| Mesenchymal | FLJ22662 | 0.046551246  | 1.811608378 |
| Mesenchymal | THBD     | 0.075520512  | 1.793804547 |
| Mesenchymal | IL1R1    | 0.154512834  | 1.759436431 |
| Mesenchymal | GPR17    | 0.337833577  | 1.755839546 |
| Mesenchymal | ARPC1B   | 0.105384681  | 1.731003747 |
| Mesenchymal | P4HA2    | 0.095838562  | 1.701306194 |
| Mesenchymal | LAMB1    | 0.279607825  | 1.660408183 |
| Mesenchymal | NCF2     | 0.069235195  | 1.65558407  |
| Mesenchymal | TIMP1    | -0.003813835 | 1.616599554 |
| Mesenchymal | MVP      | 0.188456672  | 1.609968442 |

|             |         |              |             |
|-------------|---------|--------------|-------------|
| Mesenchymal | IFI30   | 0.072817462  | 1.599089189 |
| Mesenchymal | COL8A2  | -0.071142475 | 1.598960055 |
| Mesenchymal | CNN2    | 0.197359601  | 1.592983266 |
| Mesenchymal | PSCDBP  | 0.100033298  | 1.585668474 |
| Mesenchymal | MAFB    | 0.174939042  | 1.529620085 |
| Mesenchymal | SLAMF8  | 0.022702179  | 1.528607007 |
| Mesenchymal | FER1L3  | 0.168843521  | 1.514002118 |
| Mesenchymal | C5AR1   | 0.115765433  | 1.51361621  |
| Mesenchymal | ADAM12  | 0.136807976  | 1.512657617 |
| Mesenchymal | S100A11 | 0.05094748   | 1.508572836 |
| Mesenchymal | NRP1    | 0.191873656  | 1.50556833  |
| Mesenchymal | TNFAIP8 | -0.111569624 | 1.490559773 |
| Mesenchymal | LAIR1   | 0.085575602  | 1.483873214 |
| Mesenchymal | CTSC    | 0.170917228  | 1.468256675 |
| Mesenchymal | LY75    | 0.08502604   | 1.448435602 |
| Mesenchymal | C1orf38 | 0.135222625  | 1.447385433 |
| Mesenchymal | SQRDL   | 0.004945795  | 1.439821301 |
| Mesenchymal | CTSB    | 0.203689138  | 1.428534927 |

<sup>A</sup>Top 50 signature genes were defined based on centroid score (8). Pearson correlation calculated on normalized expression data from TCGA Data Portal (85), Affymetrix Human Exon 1.0 ST microarray platform on 202 human GBM tissue samples.

<sup>B</sup>Centroid score from (8).
